# Supplementary material
Source: PubMed Central journal article supplement (PMC3934620)
Supplement: ci400682b_si_001.pdf [file ci400682b_si_001.pdf]

| compound                                                                                         | class                     | activities                                                                                             | 1pq6 | 1pqc | 3fal |
|--------------------------------------------------------------------------------------------------|---------------------------|--------------------------------------------------------------------------------------------------------|------|------|------|
| <br><b>6</b>    | LXR-β-selective           | EC <sub>50</sub> (LXR-α) = no fit<br>EC <sub>50</sub> (LXR-β) = 0.25μM                                 | -    | X    | X    |
| <br><b>4</b>    | LXR-β-selective           | EC <sub>50</sub> (LXR-α) = no fit<br>EC <sub>50</sub> (LXR-β) = 0.97μM                                 | X    | X    | X    |
| <br><b>2</b>    | LXR-β-selective           | EC <sub>50</sub> (LXR-α) = no fit<br>EC <sub>50</sub> (LXR-β) = 3.7μM                                  | X    | -    | X    |
| <br><b>3</b>    | LXR-β-selective           | EC <sub>50</sub> (LXR-α) = no fit<br>EC <sub>50</sub> (LXR-β) = 4μM                                    | X    | X    | -    |
| <br><b>1</b>    | LXR-β-selective           | EC <sub>50</sub> (LXR-α) = no fit<br>EC <sub>50</sub> (LXR-β) = 10μM                                   | -    | X    | X    |
| <br><b>12</b>   | unselective               | EC <sub>50</sub> (LXR-α) = 0.07μM<br>EC <sub>50</sub> (LXR-β) = 0.006μM<br>11.6 fold more active on β  | -    | -    | X    |
| <br><b>7</b>    | LXR-β-selective           | EC <sub>50</sub> (LXR-α) = 0.9μM<br>EC <sub>50</sub> (LXR-β) = 0.17μM<br>5.29 fold more active on β    | X    | -    | X    |
| <br><b>11</b>   | unselective               | EC <sub>50</sub> (LXR-α) = 0.18μM<br>EC <sub>50</sub> (LXR-β) = 0.035μM<br>5.14 fold more active on β  | -    | -    | -    |
| <br><b>13</b>  | unselective               | EC <sub>50</sub> (LXR-α) = 3.9μM<br>EC <sub>50</sub> (LXR-β) = 0.8μM<br>4.8 fold more active on β      | -    | -    | -    |
| <br><b>5</b>  | LXR-β-selective selective | EC <sub>50</sub> (LXR-α) = 2.1<br>EC <sub>50</sub> (LXR-β) = 0.47μM<br>4.46 fold more active on βx     | X    | -    | X    |
| <br><b>8</b>  | unselective               | EC <sub>50</sub> (LXR-α) = 0.097μM<br>EC <sub>50</sub> (LXR-β) = 0.027μM<br>3.59 fold more active on β | X    | -    | -    |
| <br><b>14</b> | unselective               | EC <sub>50</sub> (LXR-α) = 1.6μM<br>EC <sub>50</sub> (LXR-β) = 0.067μM<br>2.3 fold more active on β    | -    | -    | -    |
| <br><b>10</b> | inactive                  | EC <sub>50</sub> (LXR-α) = no fit<br>EC <sub>50</sub> (LXR-β) = no fit                                 | -    | X    | -    |
| <br><b>9</b>  | inactive                  | EC <sub>50</sub> (LXR-α) = no fit<br>EC <sub>50</sub> (LXR-β) = no fit                                 | -    | -    | -    |

299x656mm (96 x 96 DPI)
